# Supplementary material for: Carbazole and thienyl benzo[1,2,5]thiadiazole based polymers with improved open circuit voltages and processability for application in solar cells
Source: Royal Society of Chemistry journal article supplement (doi:10.1039/c1jm12089a), 2011-01-01
Supplement: c1jm12089a.pdf [file c1jm12089a.pdf]

Supplementary Information for article:

## Carbazole and Thienyl Benzo[1,2,5]Thiadiazole Based Polymers with Improved Open Circuit Voltages and Processability for Application in Solar Cells

Hunan Yi,<sup>a</sup> Solyman Al-Faifi,<sup>a</sup> Ahmed Iraqi,<sup>\*a</sup> Darren C. Watters,<sup>b</sup> James Kingsley<sup>b</sup> and David G. Lidzey<sup>\*b</sup>

<sup>a</sup> Department of Chemistry, University of Sheffield, Sheffield S3 7HF, United Kingdom,

<sup>b</sup> Department of Physics and Astronomy, University of Sheffield, Sheffield S3 7RH, United Kingdom.

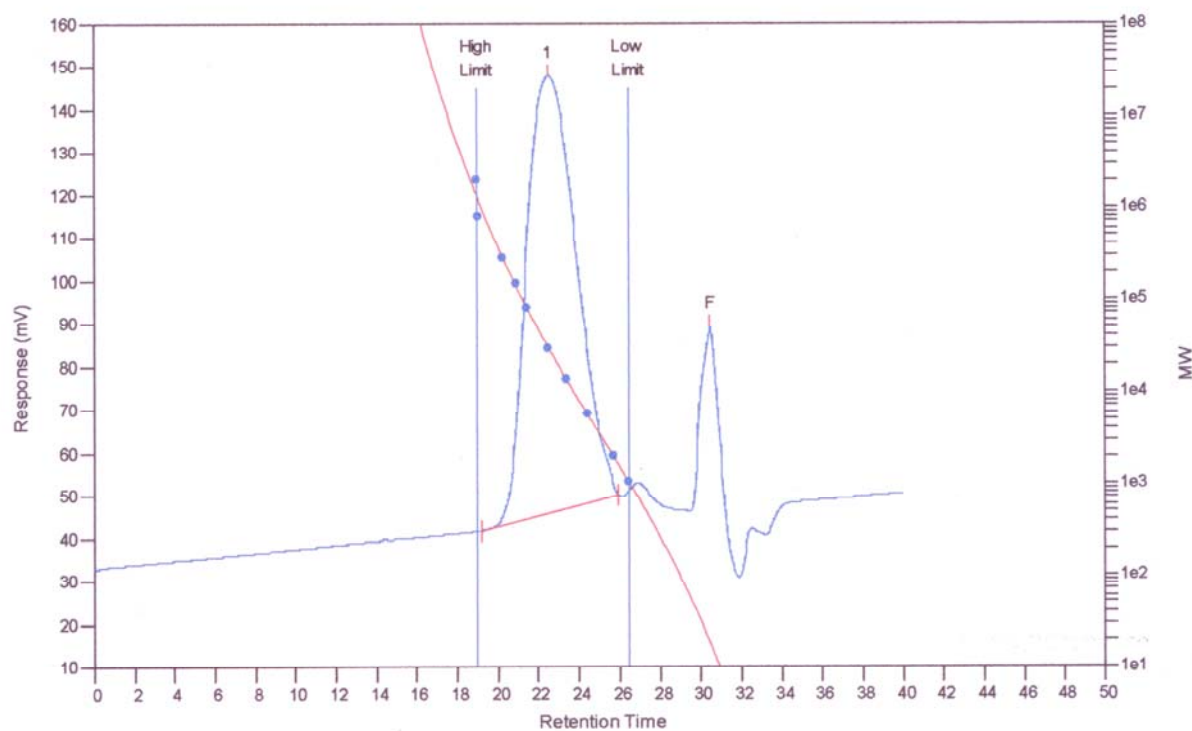

**Figure S1** GPC trace of **P1** in THF at room temperature.  $M_w = 34,800$ ,  $M_n = 14,700$ ,  $M_w/M_n = 2,37$ .

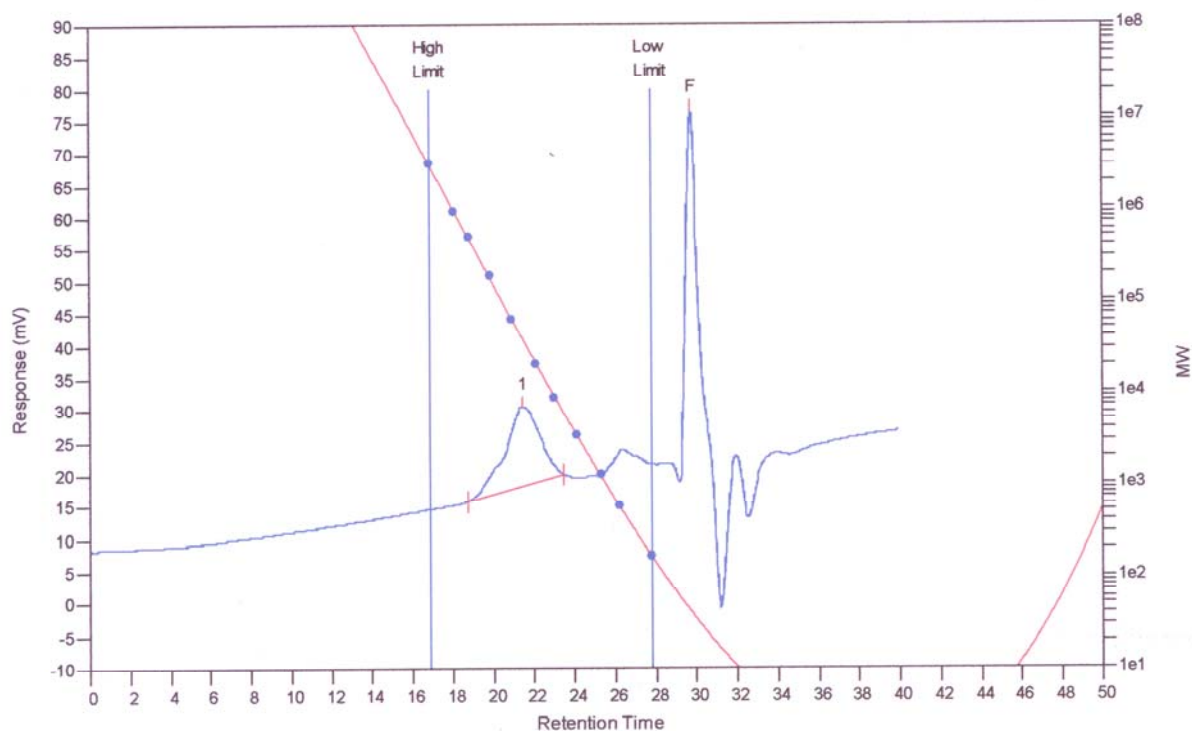

**Figure S2** GPC trace of **P2** in 1,2,4-trichlorobenzene at 100 °C.  $M_w = 57,200$ ,  $M_n = 31,100$ ,  $M_w/M_n = 1.84$ .

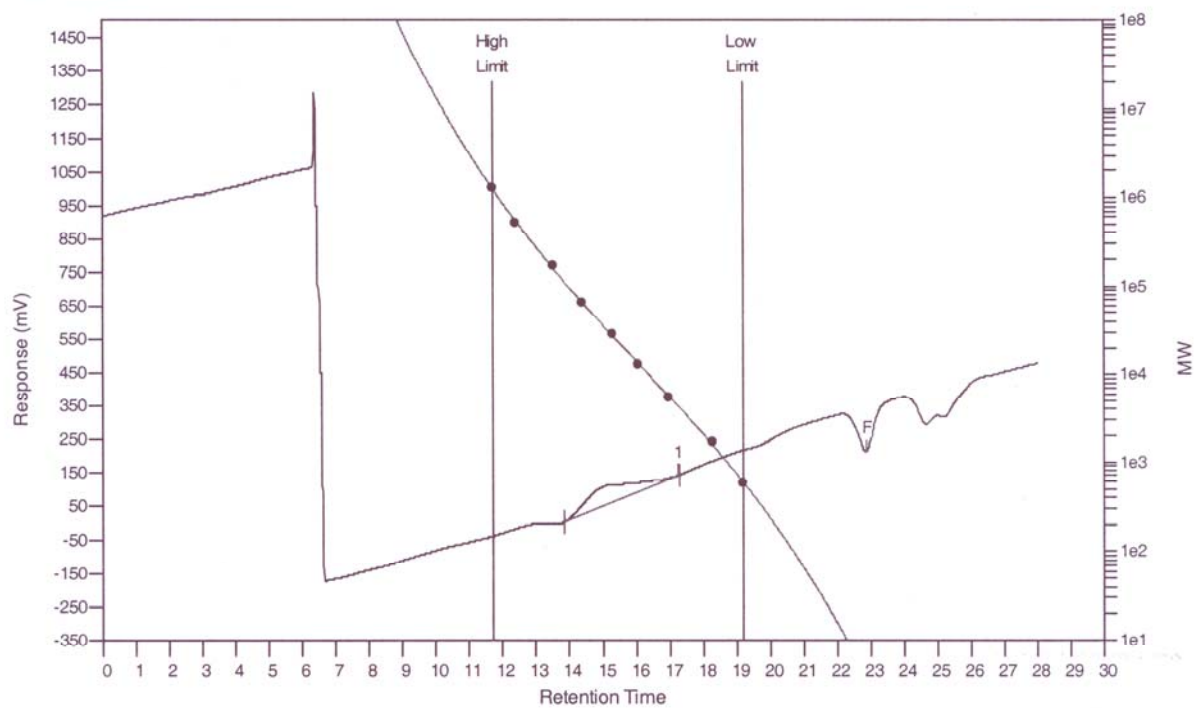

**Figure S3** GPC trace of **PCDTBT** in 1,2,4-trichlorobenzene at 100 °C.  $M_w = 32,600$ ,  $M_n = 22,500$ ,  $M_w/M_n = 1.45$ .
